# Supplementary material
Source: MDPI journal article supplement (https://www.mdpi.com/2220-9964/11/5/300)
Supplement: s1 [file s1 › ijgi-1667055-supplementary.pdf]

## Supplementary Materials

### Supplementary Figures caption:

**Figure S1** Spatial distribution of dominant factors in Anhui province during 1961–1990.

**Figure S2** Spatial distribution of dominant factors in Anhui province during 1991–2019.

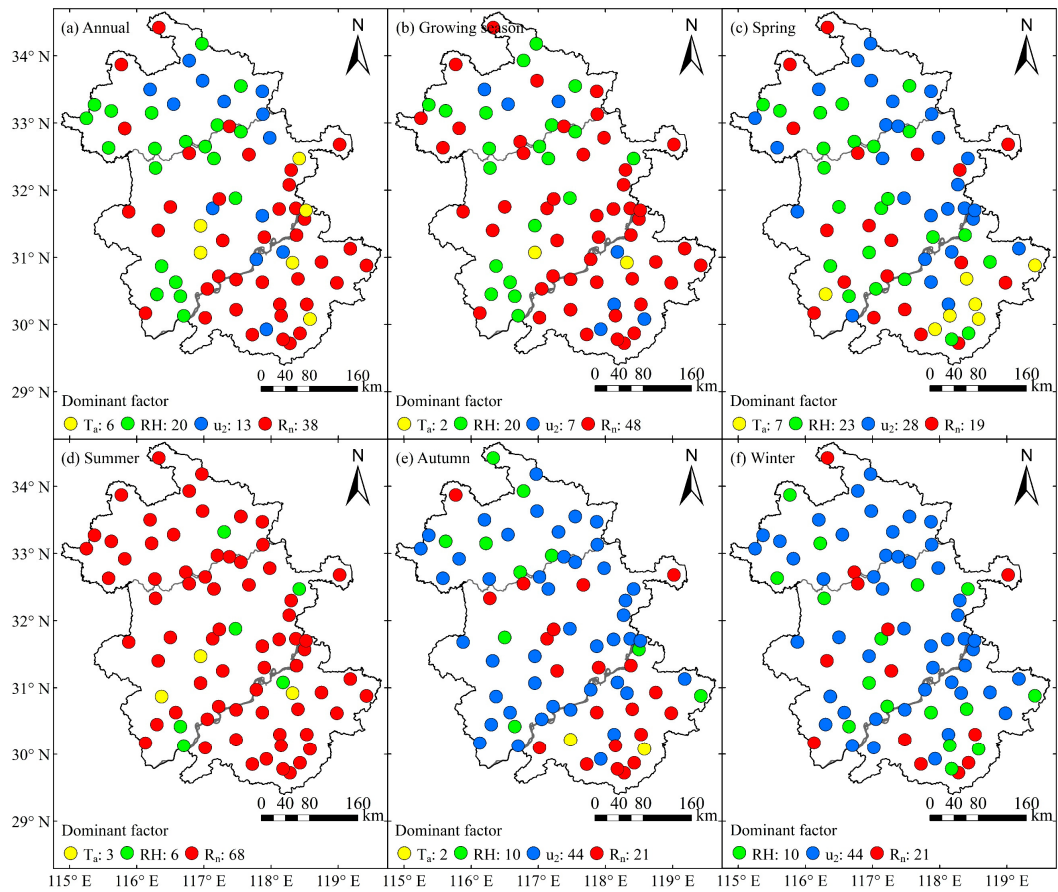

**Figure S1.** Spatial distribution of dominant factors in Anhui province during 1961–1990.

**Note:** The number in the figure denote the number of stations dominated by the corresponding climate factor.

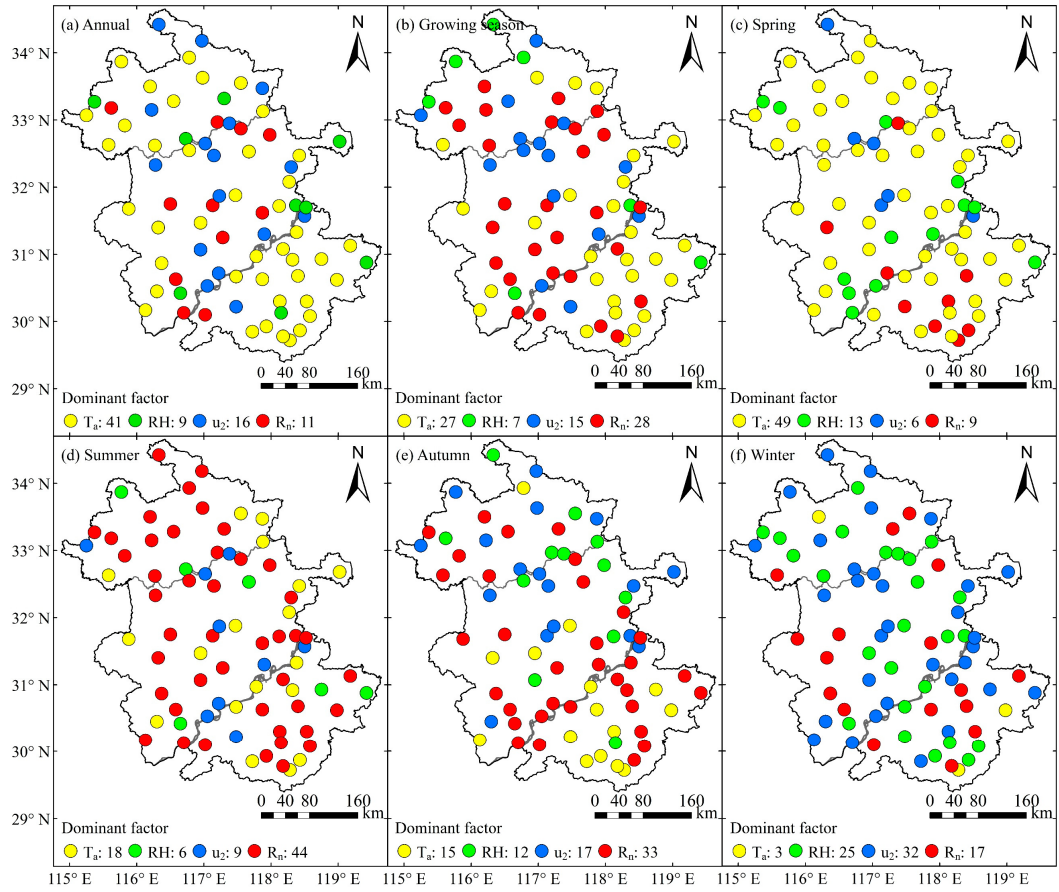

**Figure S2.** Spatial distribution of dominant factors in Anhui province during 1991-2019.

**Note:** The number in the figure denote the number of stations dominated by the corresponding climate factor.
